# Supplementary material for: The Honeybee Gut Microbiota Is Altered after Chronic Exposure to Different Families of Insecticides and Infection by Nosema ceranae
Source: PubMed Central journal article supplement (PMC6759349; doi:10.1264/jsme2.me18169), 2019-08-03
Supplement: 34_226_s1.pdf [file 34_226_s1.pdf]

**A.**

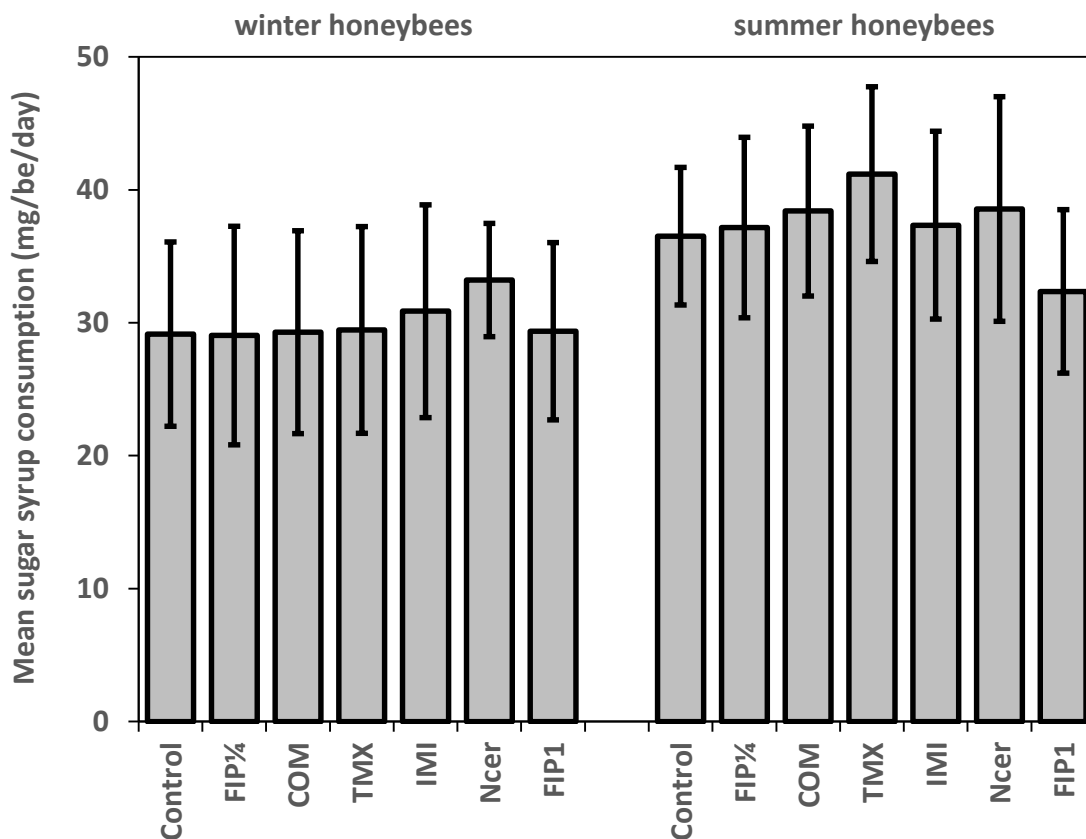

**B.**

| Condition                                    |                     | FIP¼<br>fipronil<br>0.25 ng/g | COM<br>coumaphos<br>650 ng/g | TMX<br>thiamethoxam<br>1.7 ng/g | IMI<br>imidacloprid<br>3.5 ng/g | FIP1<br>fipronil<br>1.0 ng/g |
|----------------------------------------------|---------------------|-------------------------------|------------------------------|---------------------------------|---------------------------------|------------------------------|
| Consumption<br>(ng/bee/day)<br>± IC95        | Winter<br>honeybees | 0.0074<br>± 0.0003            | 20.69<br>± 0.87              | 0.053<br>± 0.002                | 0.114<br>± 0.003                | 0.030<br>± 0.002             |
|                                              | Summer<br>honeybees | 0.0089<br>± 0.0006            | 23.68<br>± 1.51              | 0.067<br>± 0.004                | 0.127<br>± 0.006                | 0.030<br>± 0.002             |
| LD50 (ng/bee)                                |                     | 5                             | 4630                         | 15                              | 28                              | 5                            |
| Consumption<br>(fraction of<br>LD50/bee/day) | Winter<br>honeybees | 1:679                         | 1:224                        | 1:282                           | 1:245                           | 1:167                        |
|                                              | Summer<br>honeybees | 1:560                         | 1:194                        | 1:222                           | 1:221                           | 1:164                        |

**Supplementary Figure S1. Sucrose (A) and insecticide (B) consumption of honeybees chronically exposed to insecticides or infected with *Nosema ceranae*.** Insecticides were added in the feeding sugar syrup *ad. lib.*, and spores of *N. ceranae* were orally administered to the honeybees at the beginning of the experiment. Control bees were not exposed to any stressor. (A) Mean daily sugar consumption in winter (left panel) and summer (right panel) honeybees. Bars represent the 95% confidence intervals. No significant difference was observed. (B) Mean daily consumption of insecticides and comparison with the oral LD50 given by Mullin *et al.* (62).

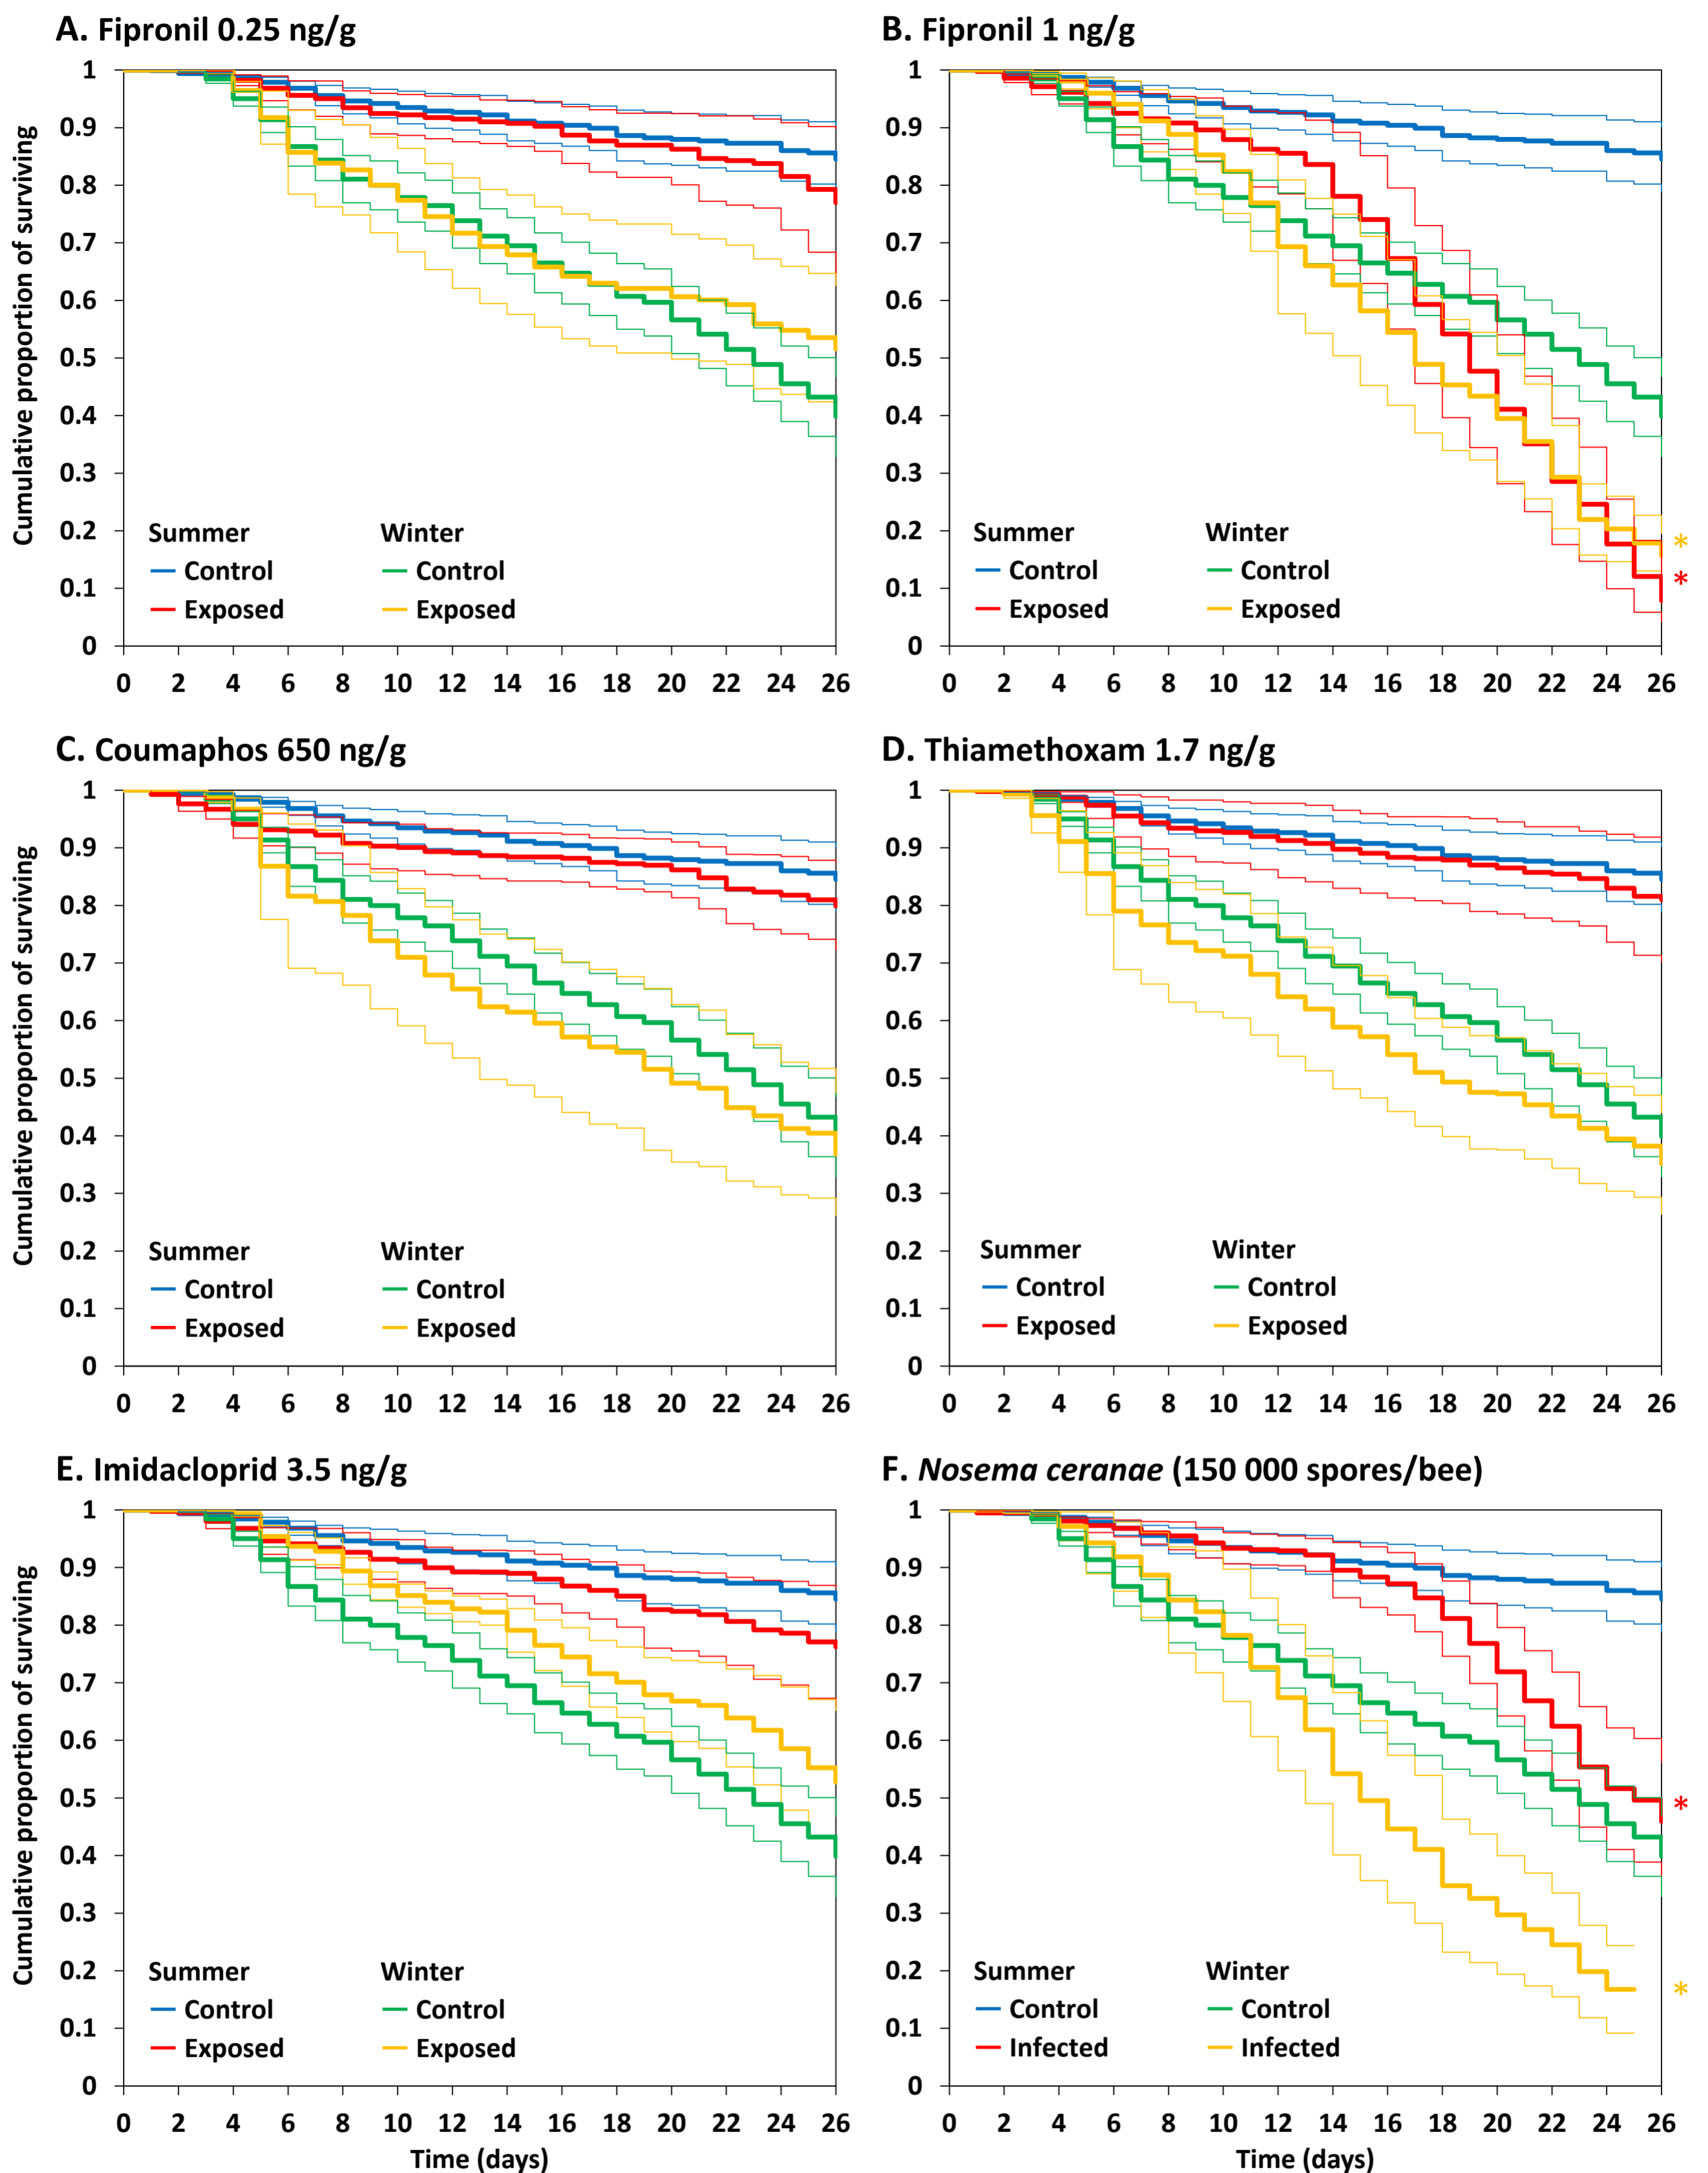

**Supplementary Figure S2. Cumulative proportion of surviving honeybees chronically exposed to insecticides (A-E) or infected with spores of *Nosema ceranae* (F) in winter (red) or summer (yellow) compared to untreated control in winter (blue) or summer (green).** Insecticides were added in the feeding sugar syrup, and spores of *N. ceranae* were orally administered at the beginning of the experiment. Control bees were not exposed to any stressor. Survival proportion was estimated using the Kaplan-Meier method. Thick curves represent the mean values from five colony replicates ( $n = 5$  with 66 to 74 bees per replicate and per condition at day 0) and the thin curves represent the amplitude of the standard error. Log rank  $\chi^2$  tests using data from single colony replicates showed significant effects ( $p < 0.005$ ) of 0.25 ng/g fipronil on one colony in winter, of coumaphos on one colony in summer, and of imidacloprid on two colonies in summer. As these effects were clearly not reproduced among replicates, they were considered as not significant. Only the decrease of survival in infected bees (F) and in bees submitted to 1 ng/g fipronil (B) was significant in all colony replicates (with  $\chi^2 > 9.1$  and  $p < 0.0025$ ), and thus considered as globally significant (\*).

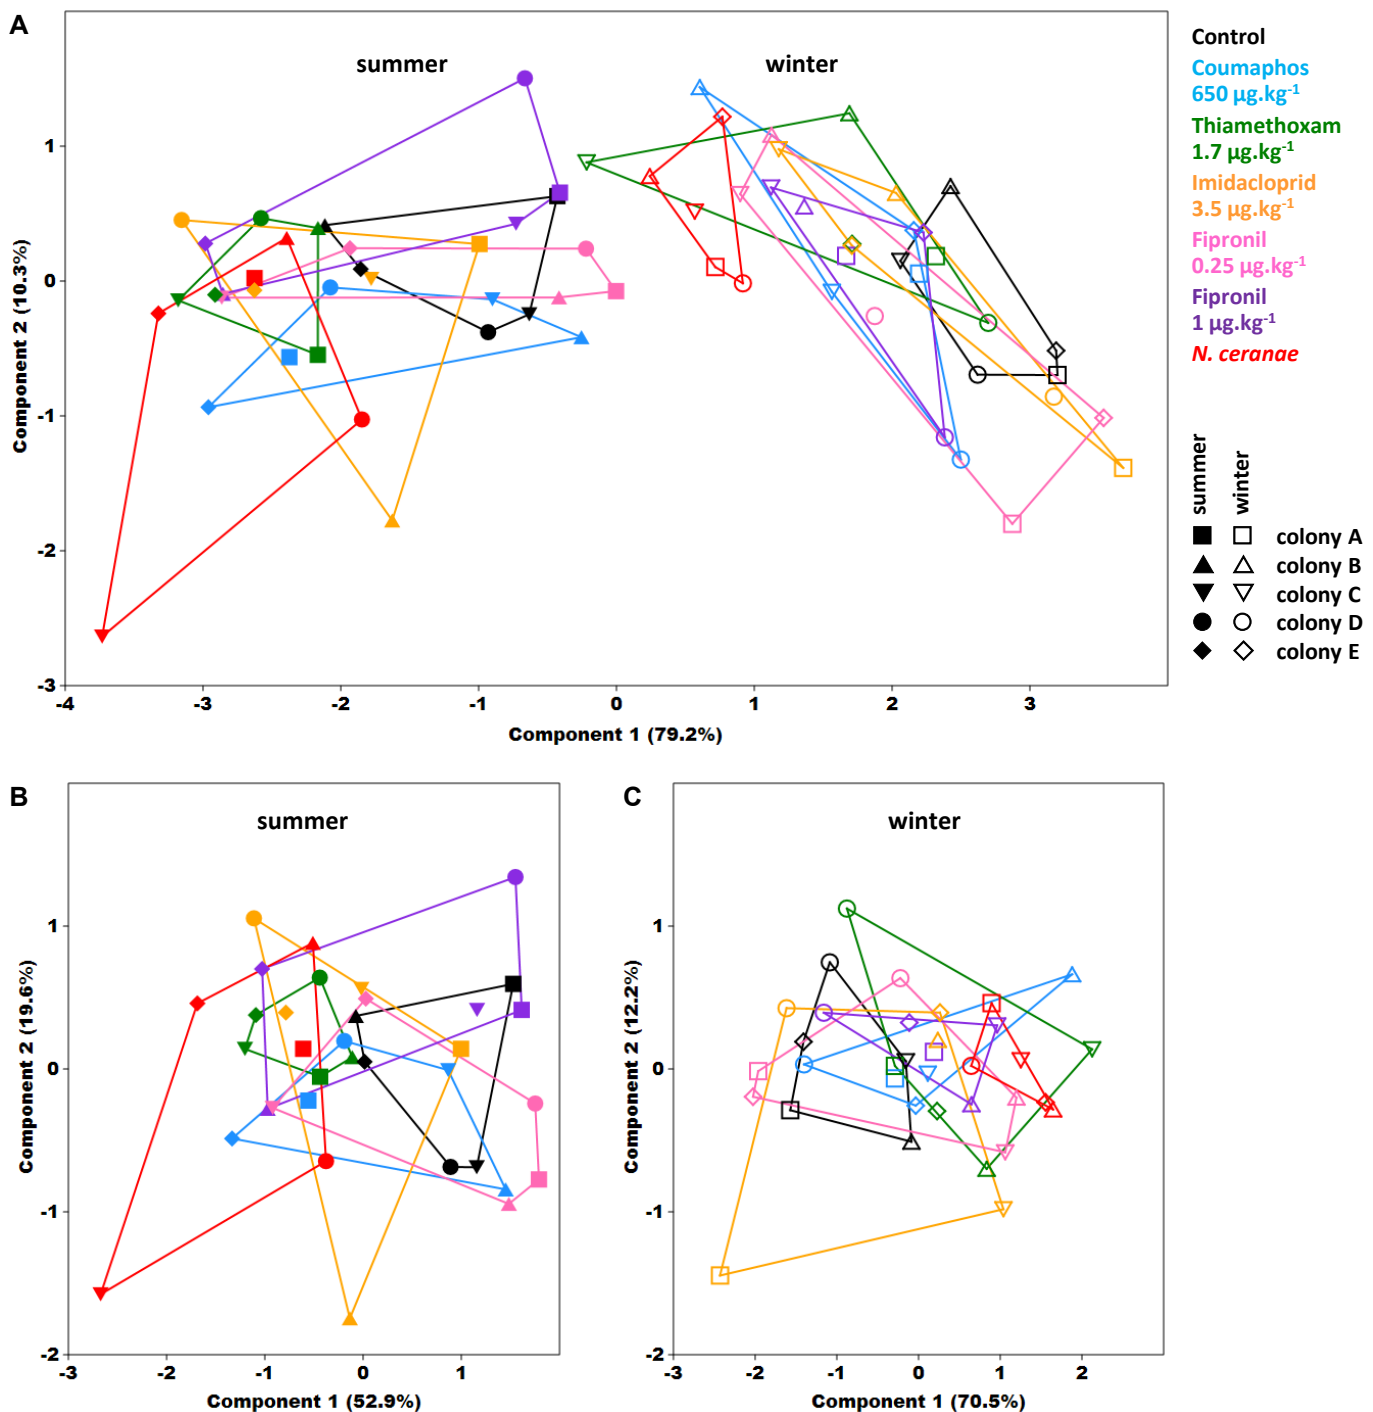

**Supplementary Figure S3. Principal component analysis of QPCR data.** Analyses were performed using the normalized Cq to total bacterial content in all (A) or in summer (filled signs, B) or in winter (empty signs, C) honeybees. In order to avoid redundant data for the same taxa, only values obtained for all *Lactobacillus* spp., *Bifidobacterium* spp., *Alphaproteobacteria*, *G. apicola* and *S. alvi* were included. Almost identical results were obtained exchanging primer pairs data for a similar taxon. In A more than 79% of the variance explained by one principal component that seemed mainly linked to the season. In B and C, only control and *N. ceranae* observations were clearly separated. In all analyses, only the first component was significant (broken stick model). Two-ways ANOVA (not shown) revealed significant effect of season for all taxa except *Neisseriaceae* and *S. alvi* (in accordance with Fig.1), and significant effect of treatment in accordance with the Fig. 2.
